# Supplementary material
Source: ML conference proceedings conference paper supplement (https://openreview.net/forum?id=Ouc1F0Sfb7)
Supplement: supplementary_material [file attachment]

**(a) Samples from prior**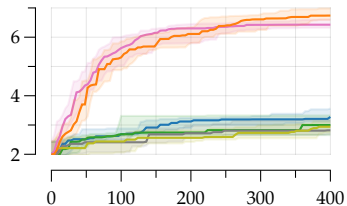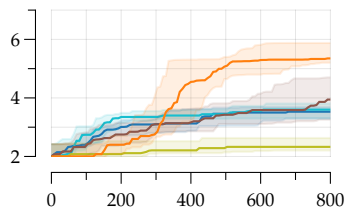**(b) Ackley function**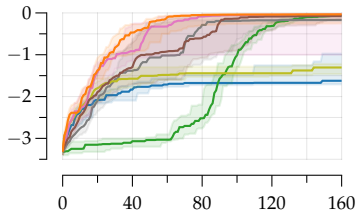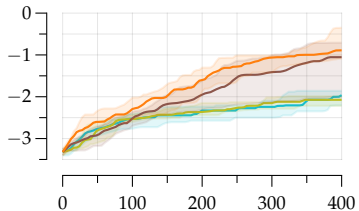**(c) Pest control**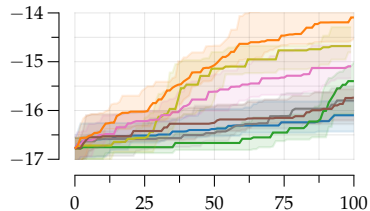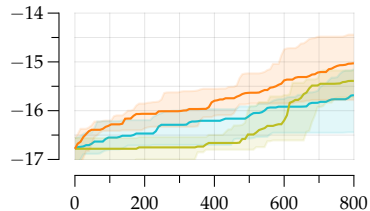**(d) Lunar lander**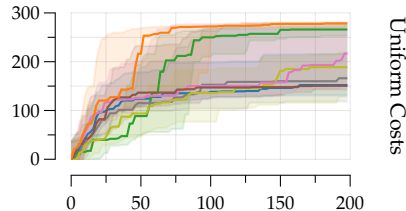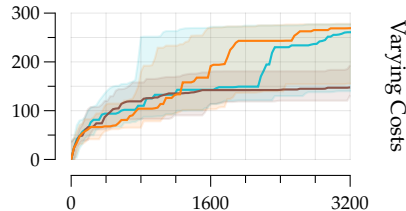

Cumulative Cost

Pandora's Box Gittins Index (PBGI)

Upper Confidence Bound (UCB)

Expected Improvement (EI)

EI Per Unit Cost (EIPC)

Thompson Sampling

Knowledge Gradient

(Budgeted) Multi-Step EI

(Multi-fidelity) Max-value Entropy Search
