# Supplementary material
Source: ML conference proceedings conference paper supplement (https://openreview.net/forum?id=Ouc1F0Sfb7)
Supplement: supplementary_material [file attachment]

# Pandora's Box

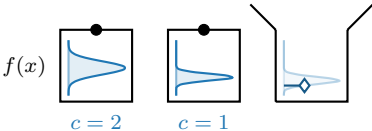

$\alpha^*$ : Bayesian-optimal acquisition function

add correlations and  
take continuum limit

incorporate  $f \mid y_1, \dots, y_t$

# Bayesian Optimization

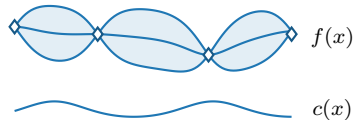

$\alpha_t^{\text{PBG1}}$ : acquisition function proposed in this work
