# Supplementary material
Source: ML conference proceedings conference paper supplement (https://openreview.net/forum?id=Ouc1F0Sfb7)
Supplement: supplementary_material [file attachment]

# Prior Distribution

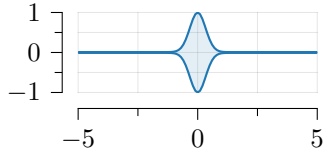

# Cost Function

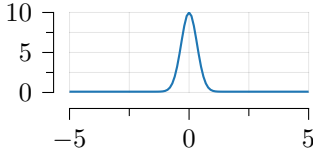

# Log Regret

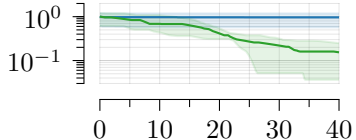

— Expected Improvement per unit cost

— Pandora's Box Gittins Index
