# Supplementary material
Source: ML conference proceedings conference paper supplement (https://openreview.net/forum?id=Ouc1F0Sfb7)

Best Observed Value

Pest Control

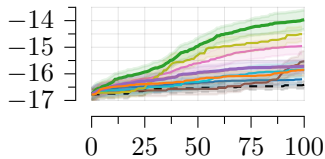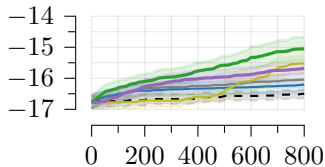

Lunar Lander

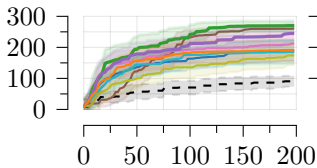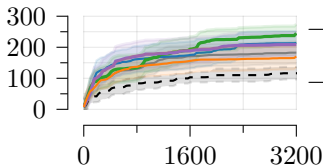

Robot Pushing

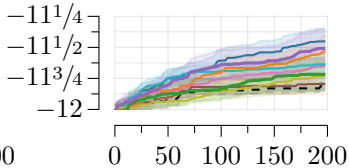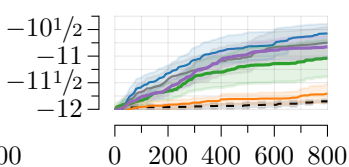

Uniform-cost

Varying-cost

Cumulative Cost

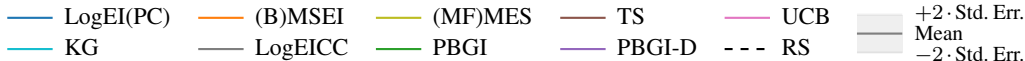

Supplement: supplementary_material [file attachment]
