# Supplementary material
Source: ML conference proceedings conference paper supplement (https://openreview.net/forum?id=Ouc1F0Sfb7)

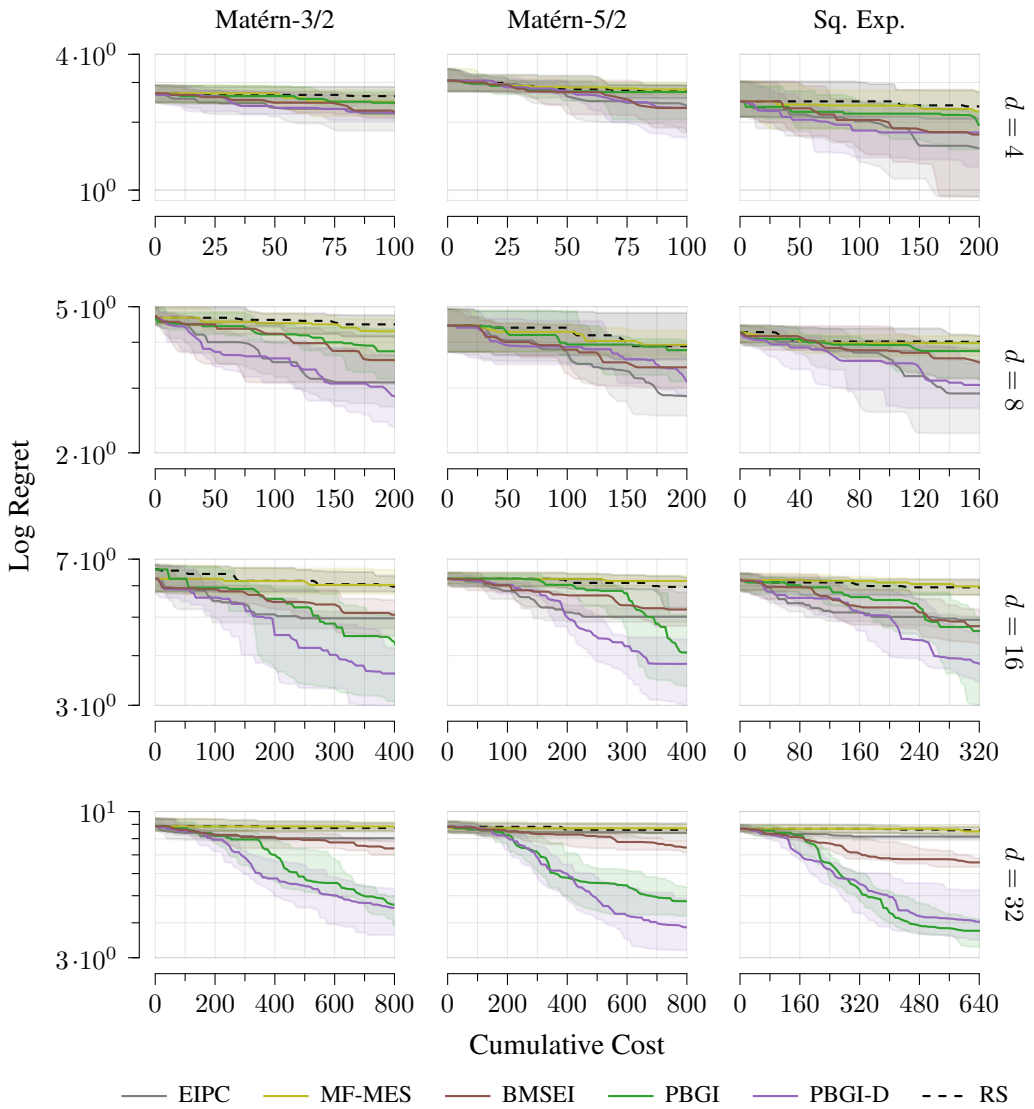

Supplement: supplementary_material [file attachment]

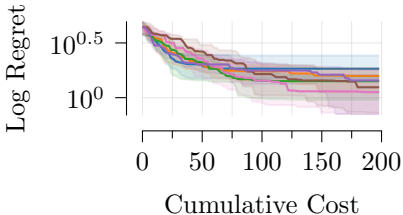

- |                                 |                                 |
|---------------------------------|---------------------------------|
| — PBGI ( $\lambda = 0.01$ )     | — PBGI ( $\lambda = 0.001$ )    |
| — PBGI ( $\lambda = 0.0001$ )   | — PBGI ( $\lambda = 0.000001$ ) |
| — PBGI ( $\lambda = 0.000001$ ) | — PBGI-D                        |

Supplement: supplementary_material [file attachment]

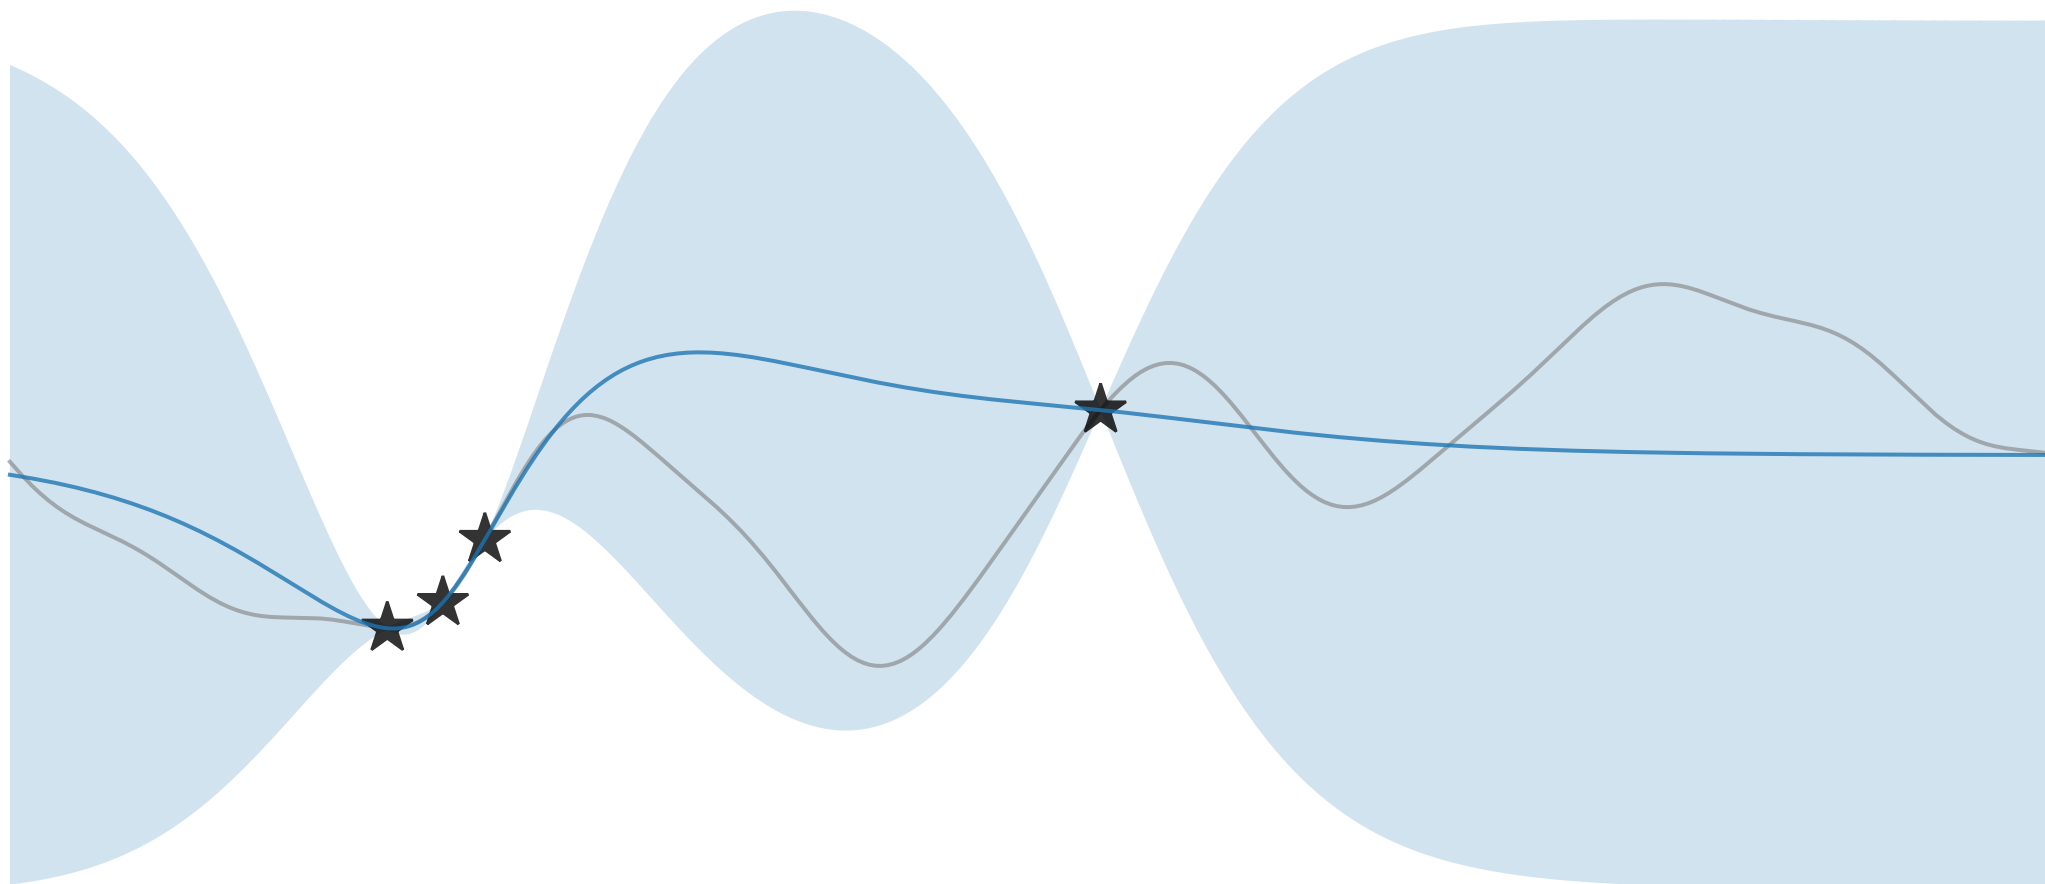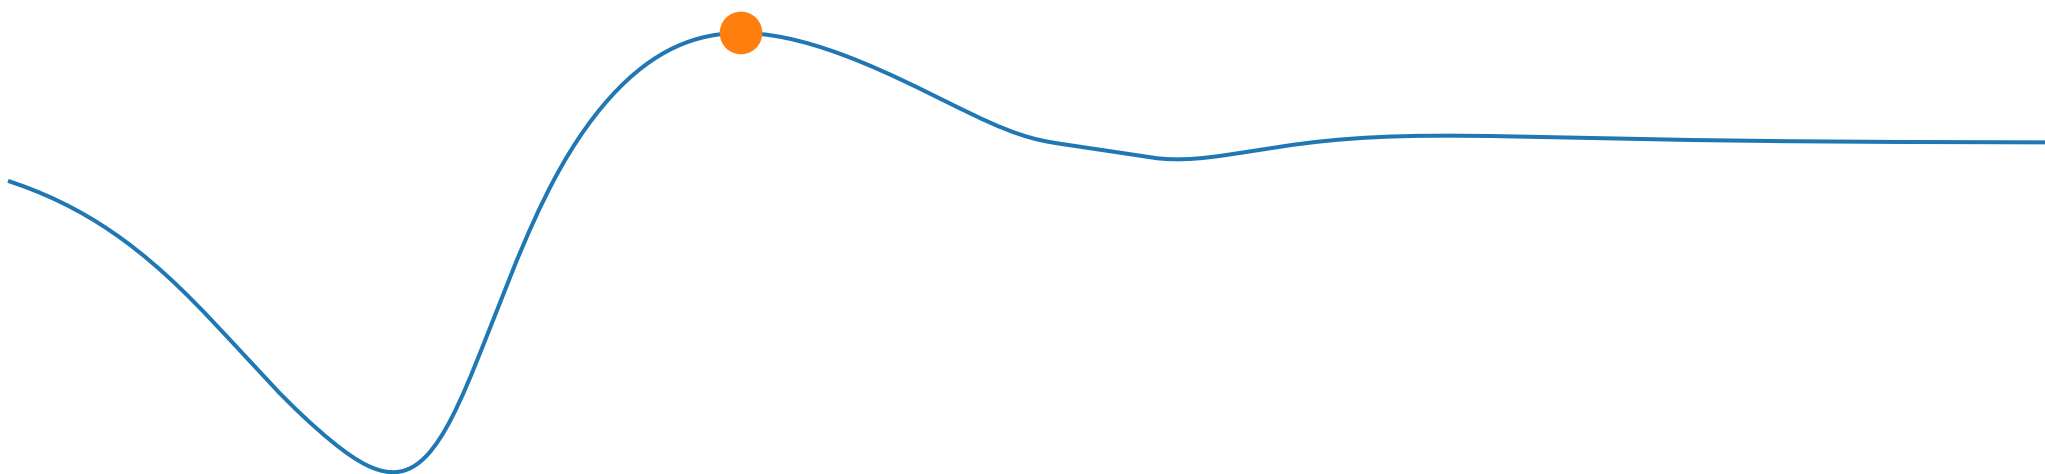

Supplement: supplementary_material [file attachment]

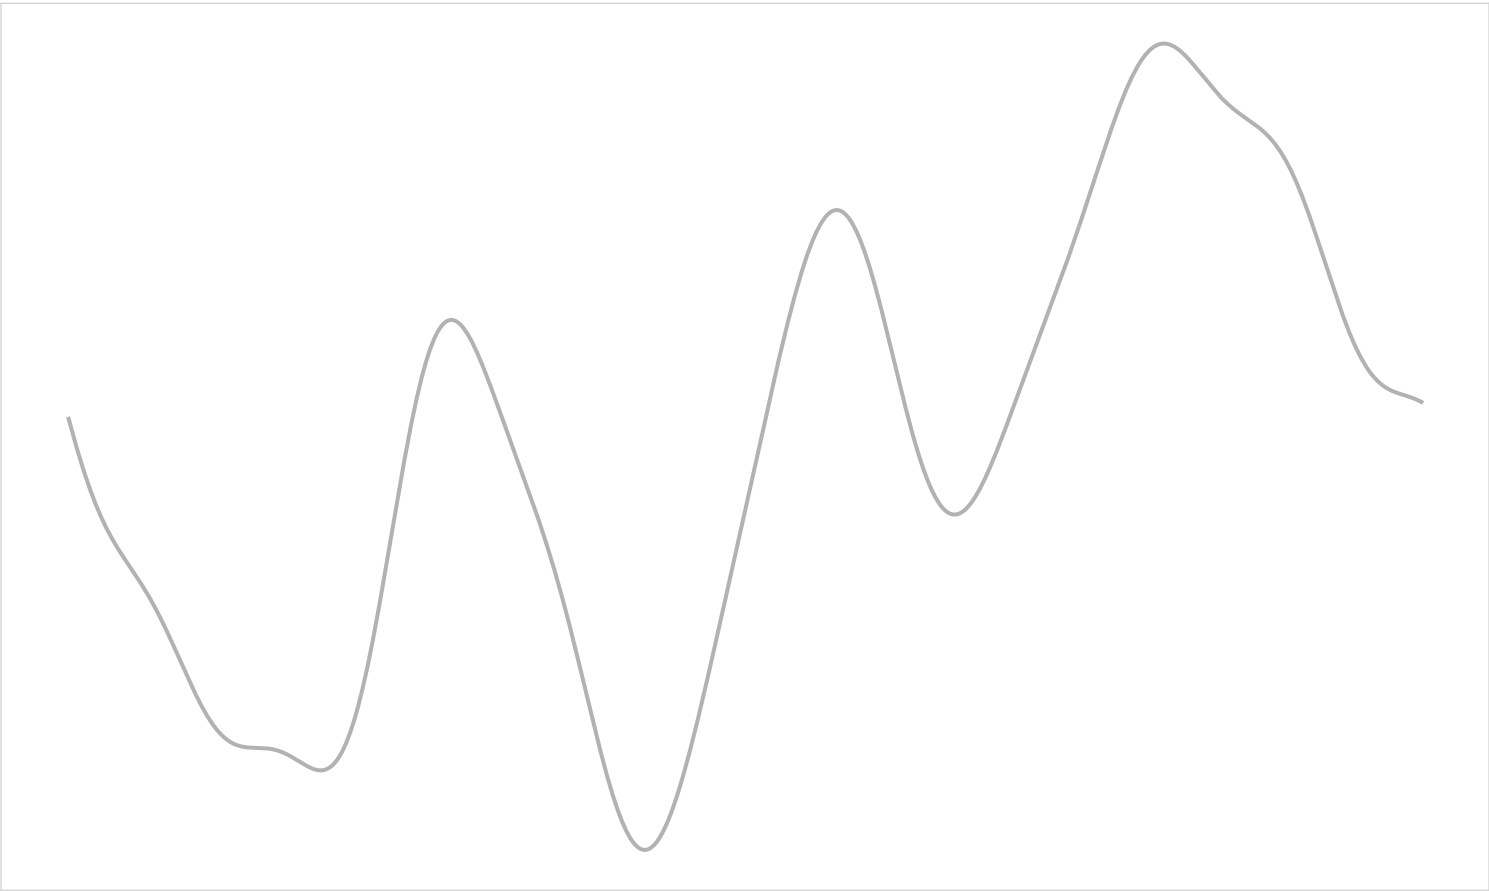

Supplement: supplementary_material [file attachment]

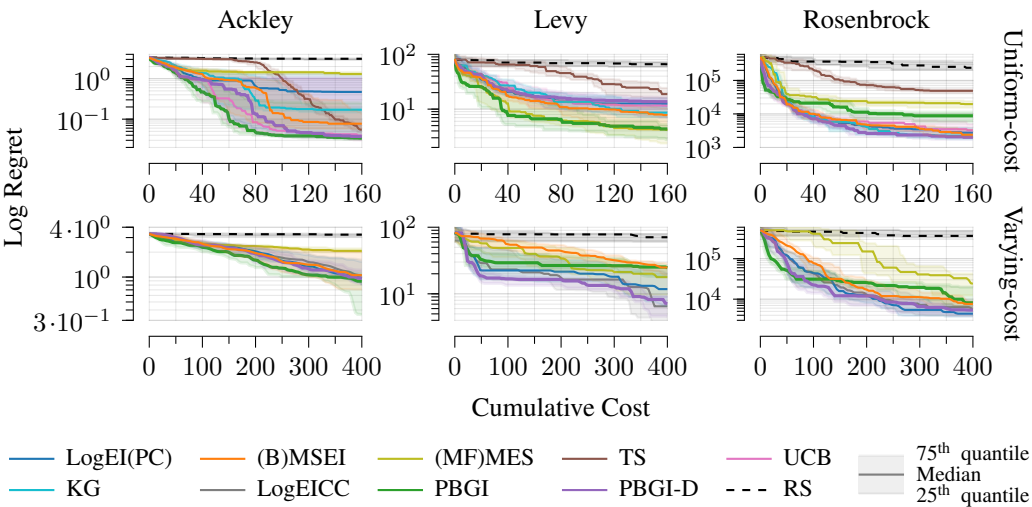

Supplement: supplementary_material [file attachment]

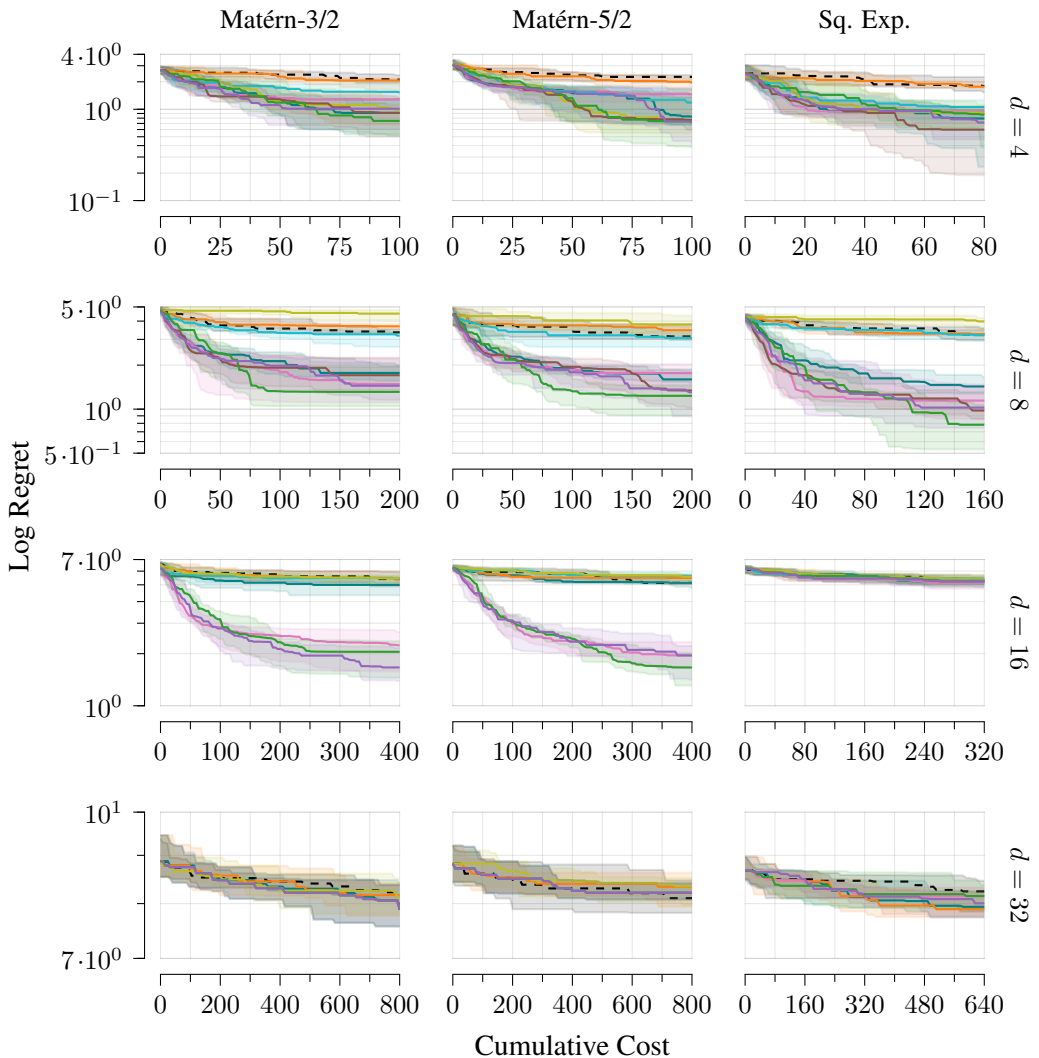

Supplement: supplementary_material [file attachment]

$d = 4$ 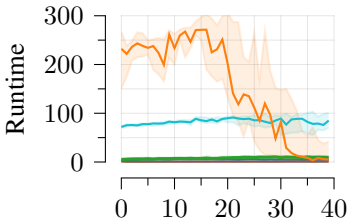 $d = 8$ 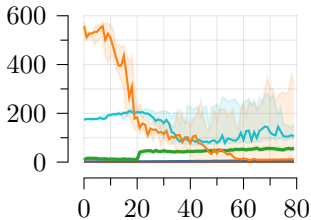 $d = 16$ 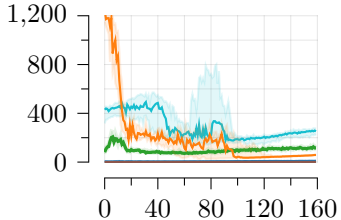

Cumulative Cost

— LogEI — MSEI — PBGI — TS — KG

75<sup>th</sup> quantile  
Median  
25<sup>th</sup> quantile

Supplement: supplementary_material [file attachment]

# Bayesian Regret

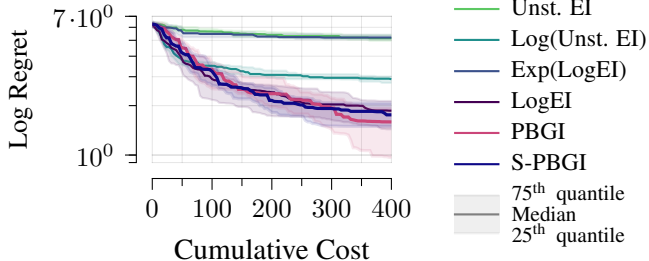

Supplement: supplementary_material [file attachment]

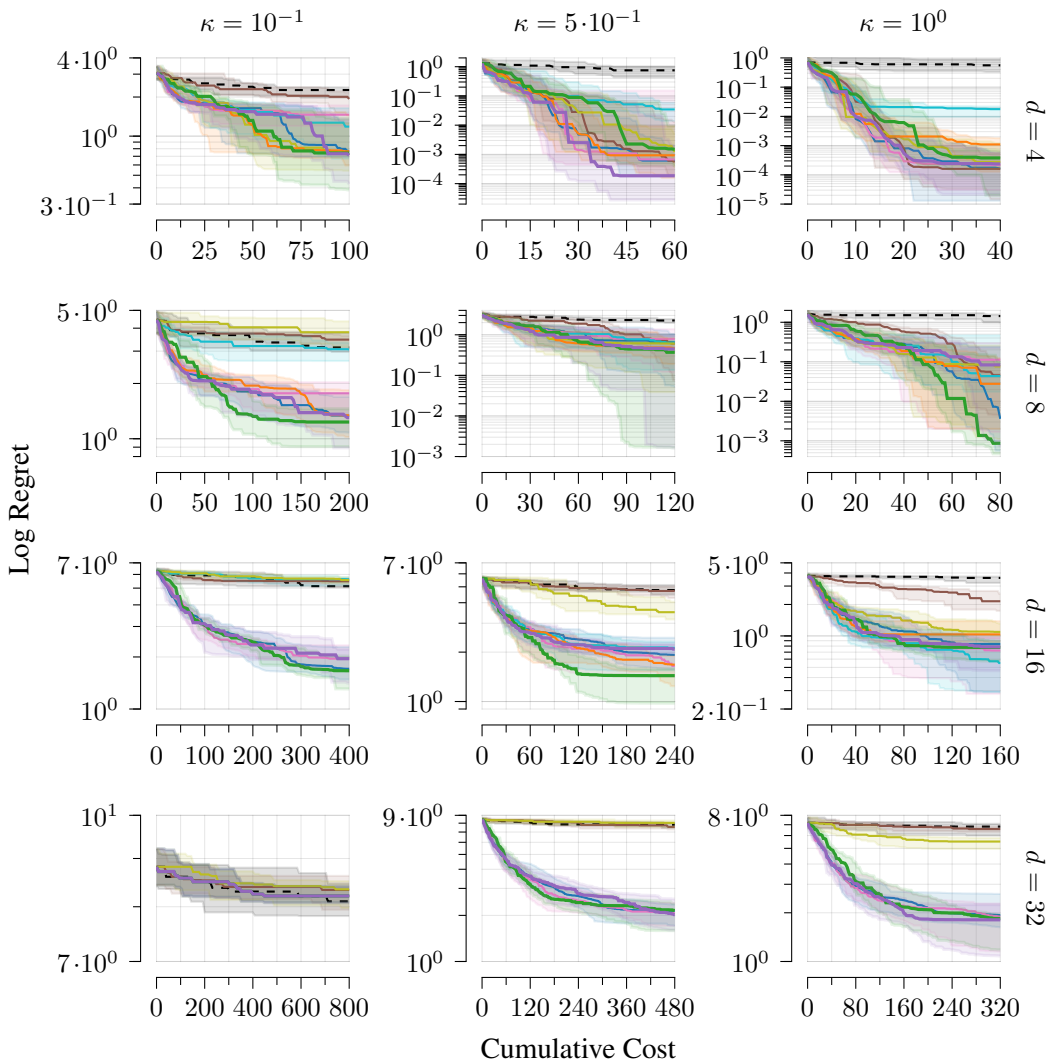

Supplement: supplementary_material [file attachment]

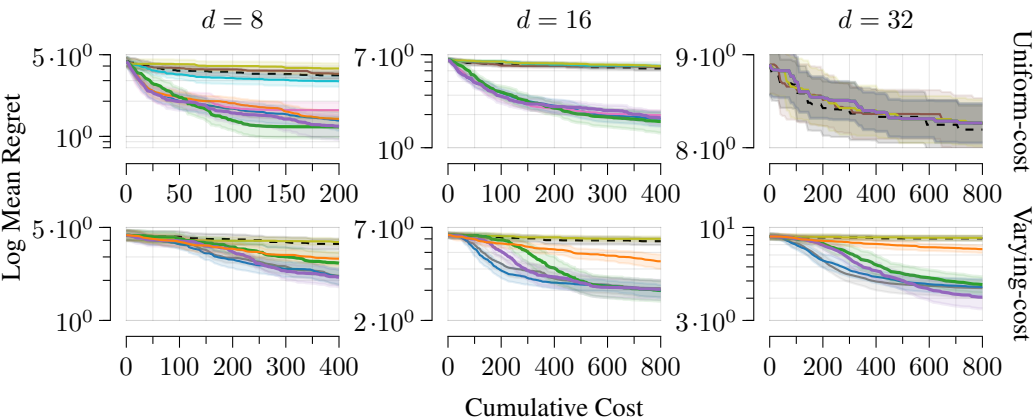

Supplement: supplementary_material [file attachment]

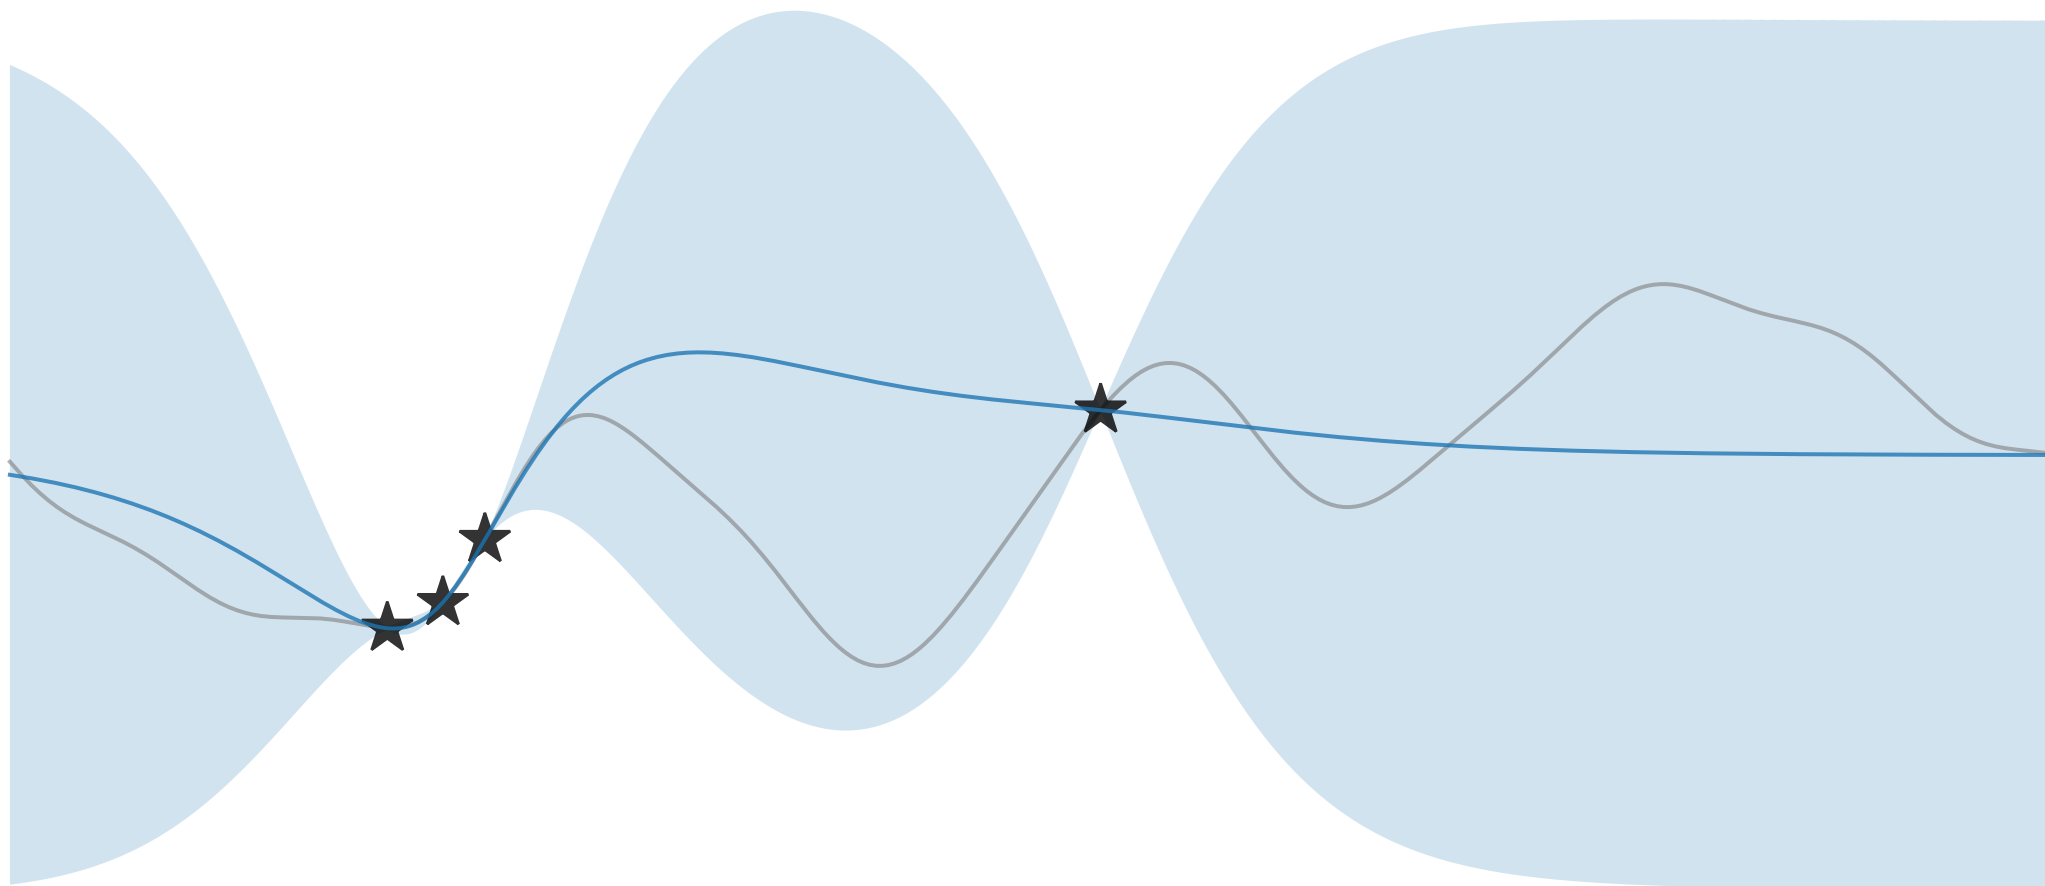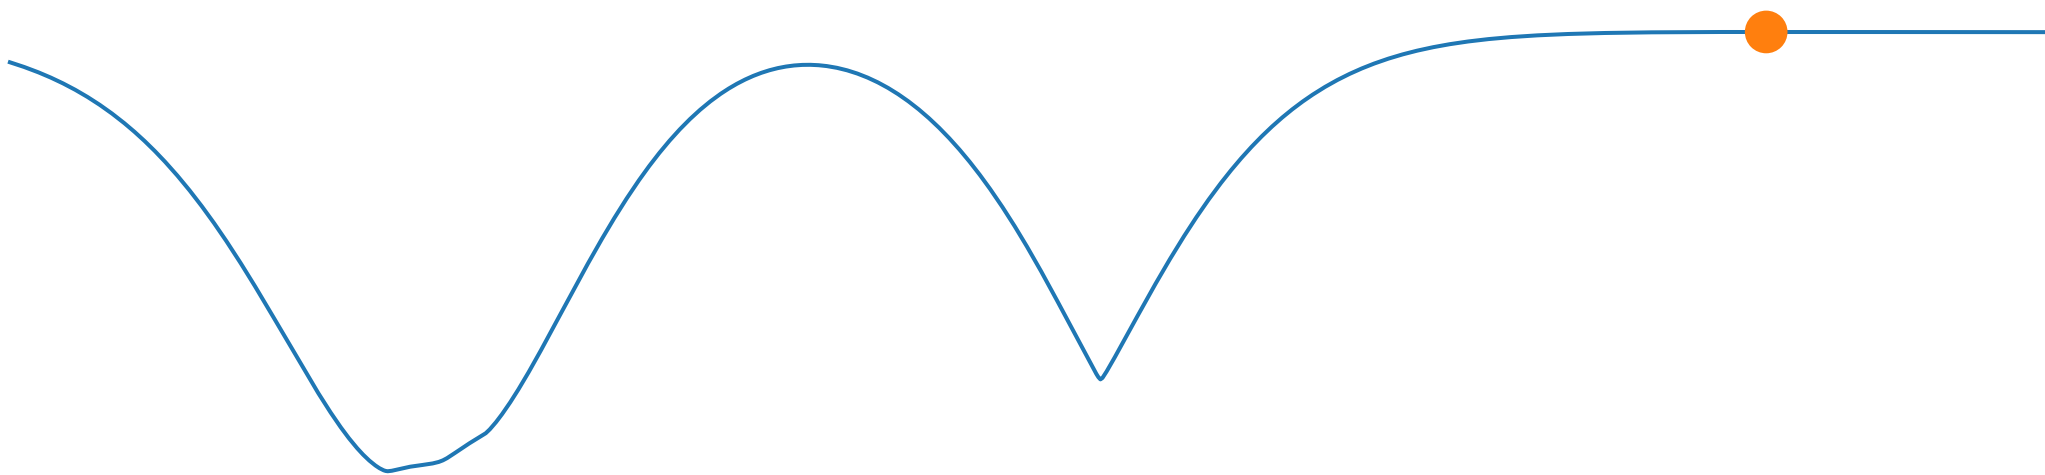

Supplement: supplementary_material [file attachment]

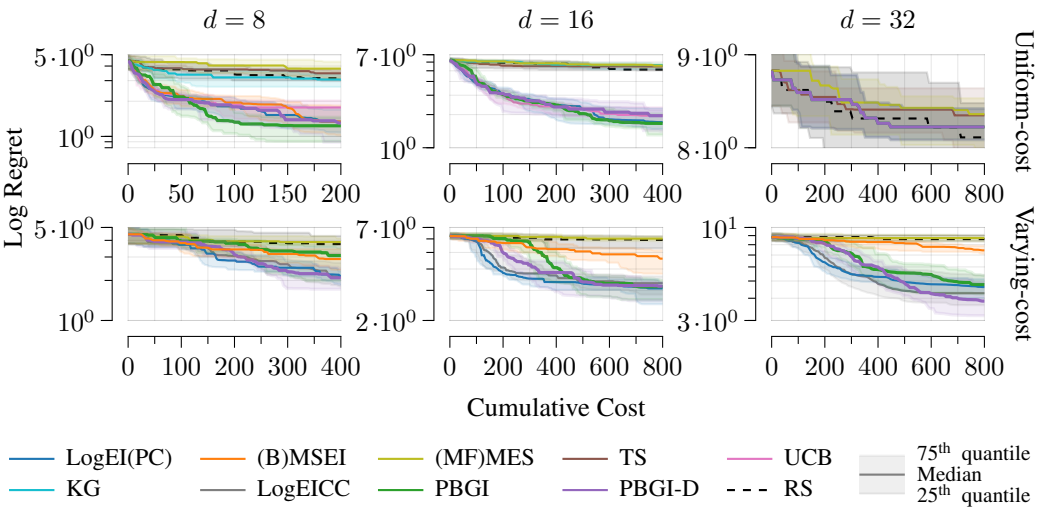

Supplement: supplementary_material [file attachment]

Std. Dev.

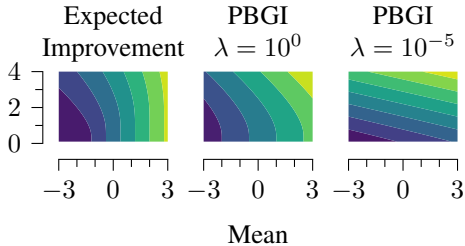

$5 \cdot 10^0$

$10^0$

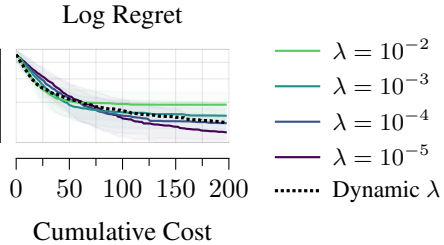

Supplement: supplementary_material [file attachment]

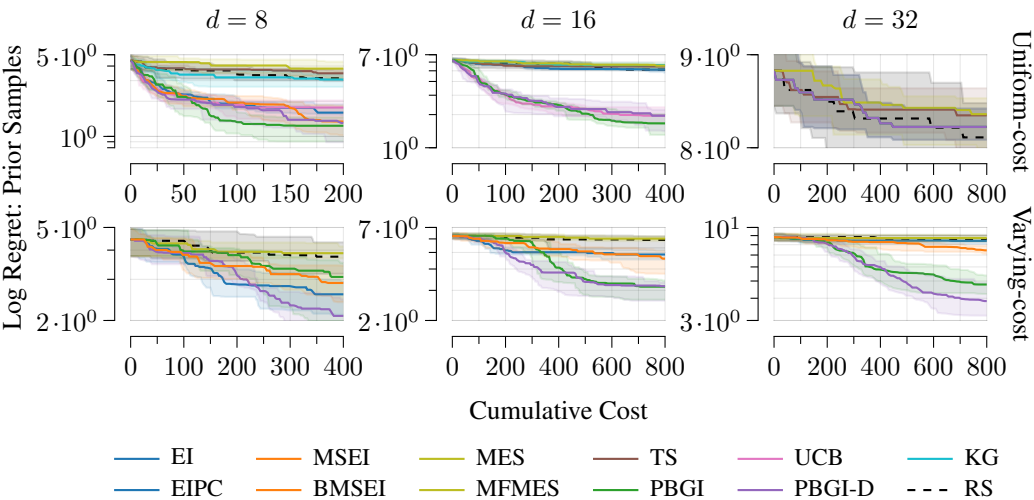

Supplement: supplementary_material [file attachment]

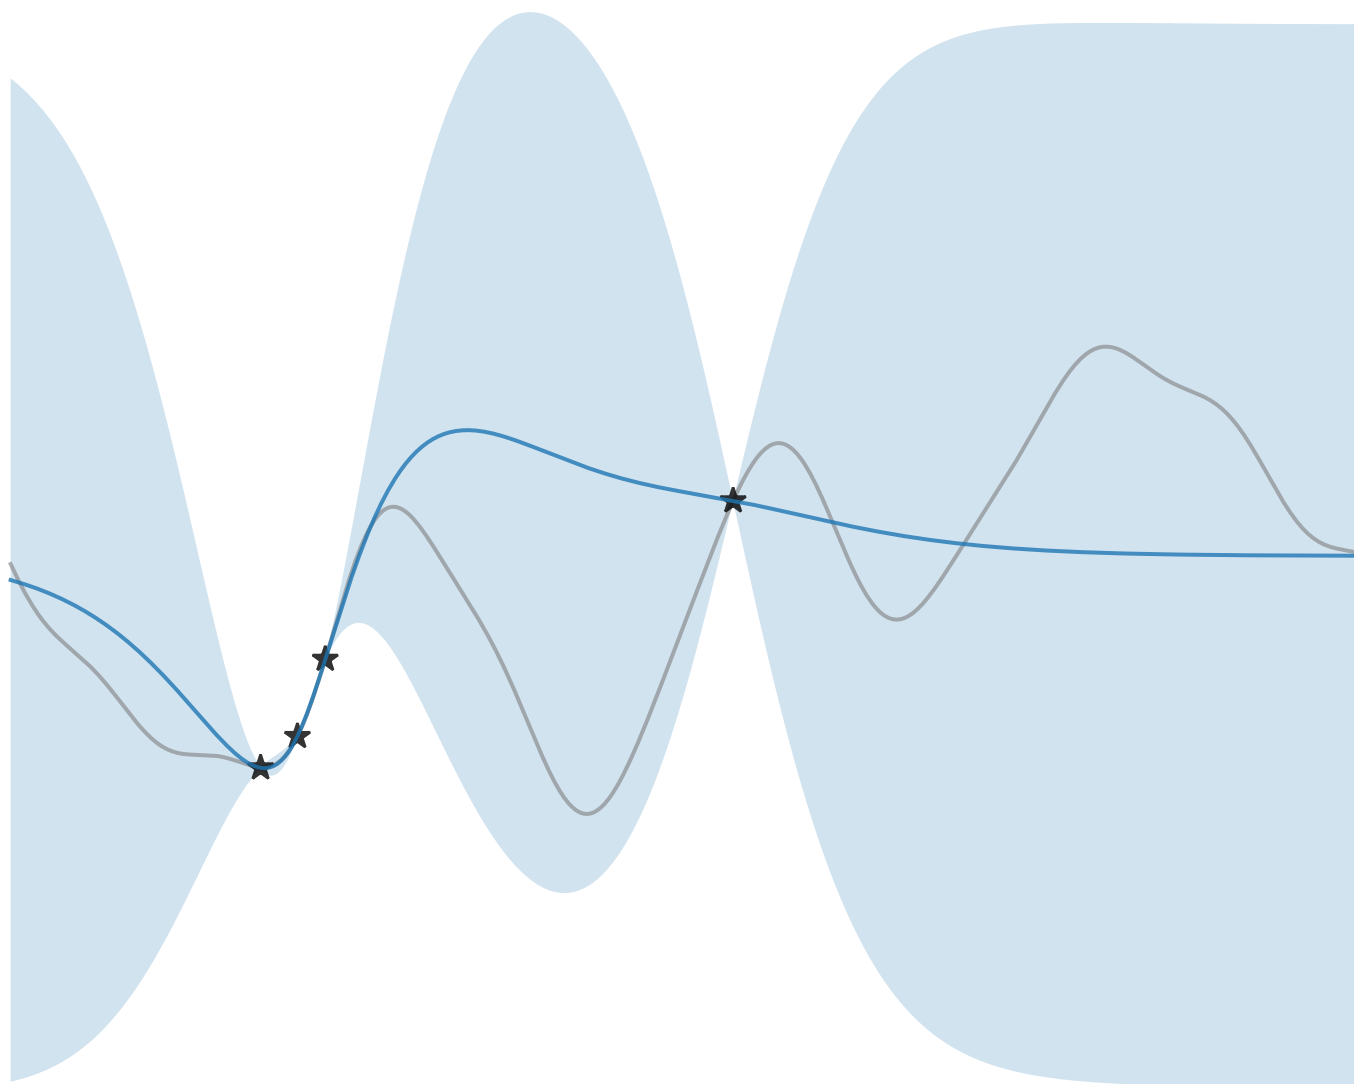

Supplement: supplementary_material [file attachment]

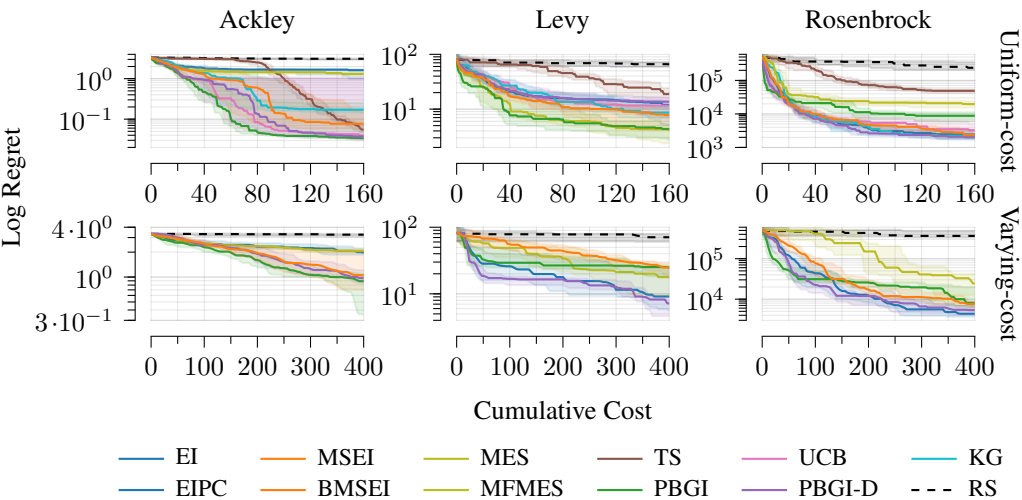

Supplement: supplementary_material [file attachment]

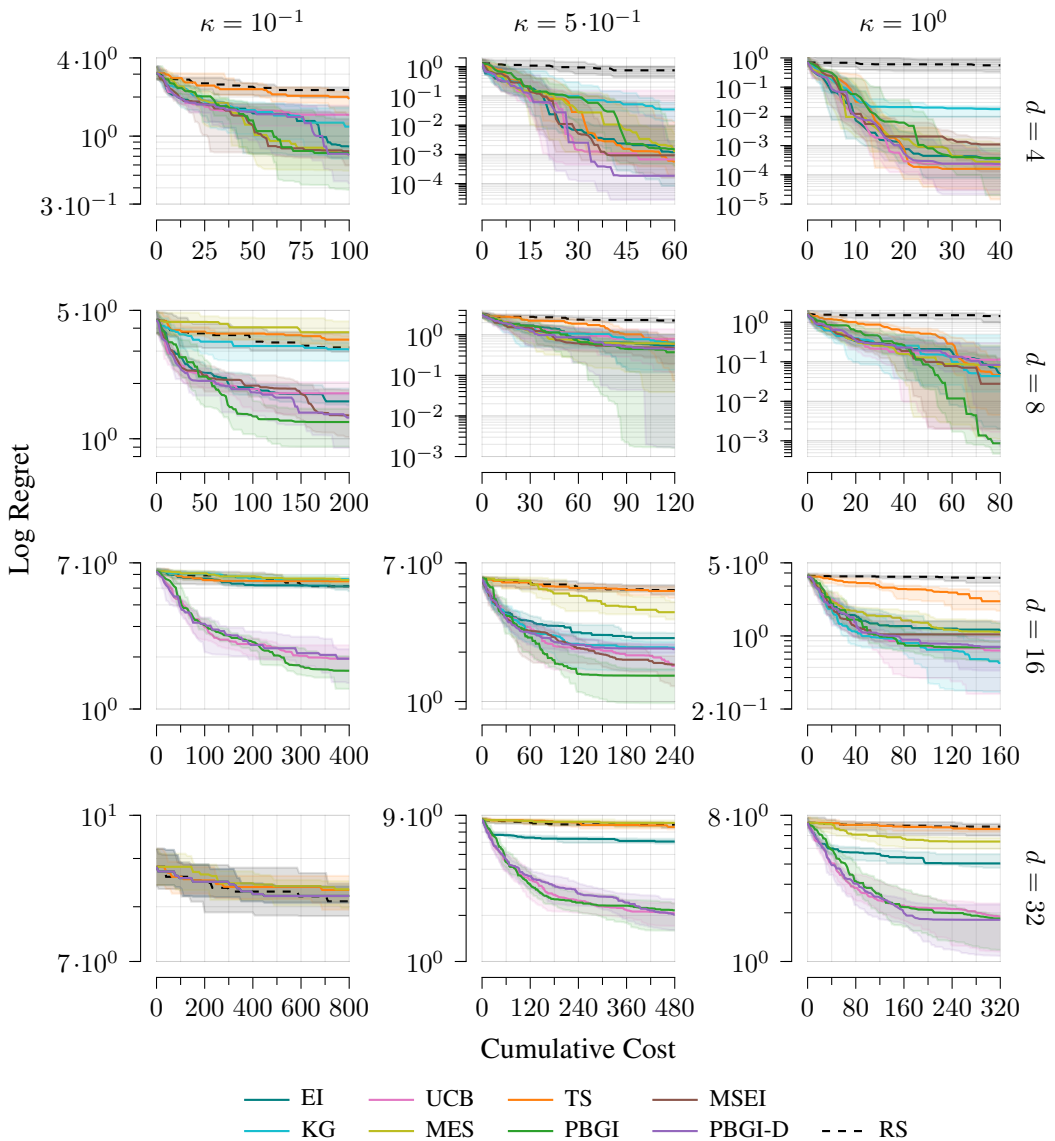

Supplement: supplementary_material [file attachment]

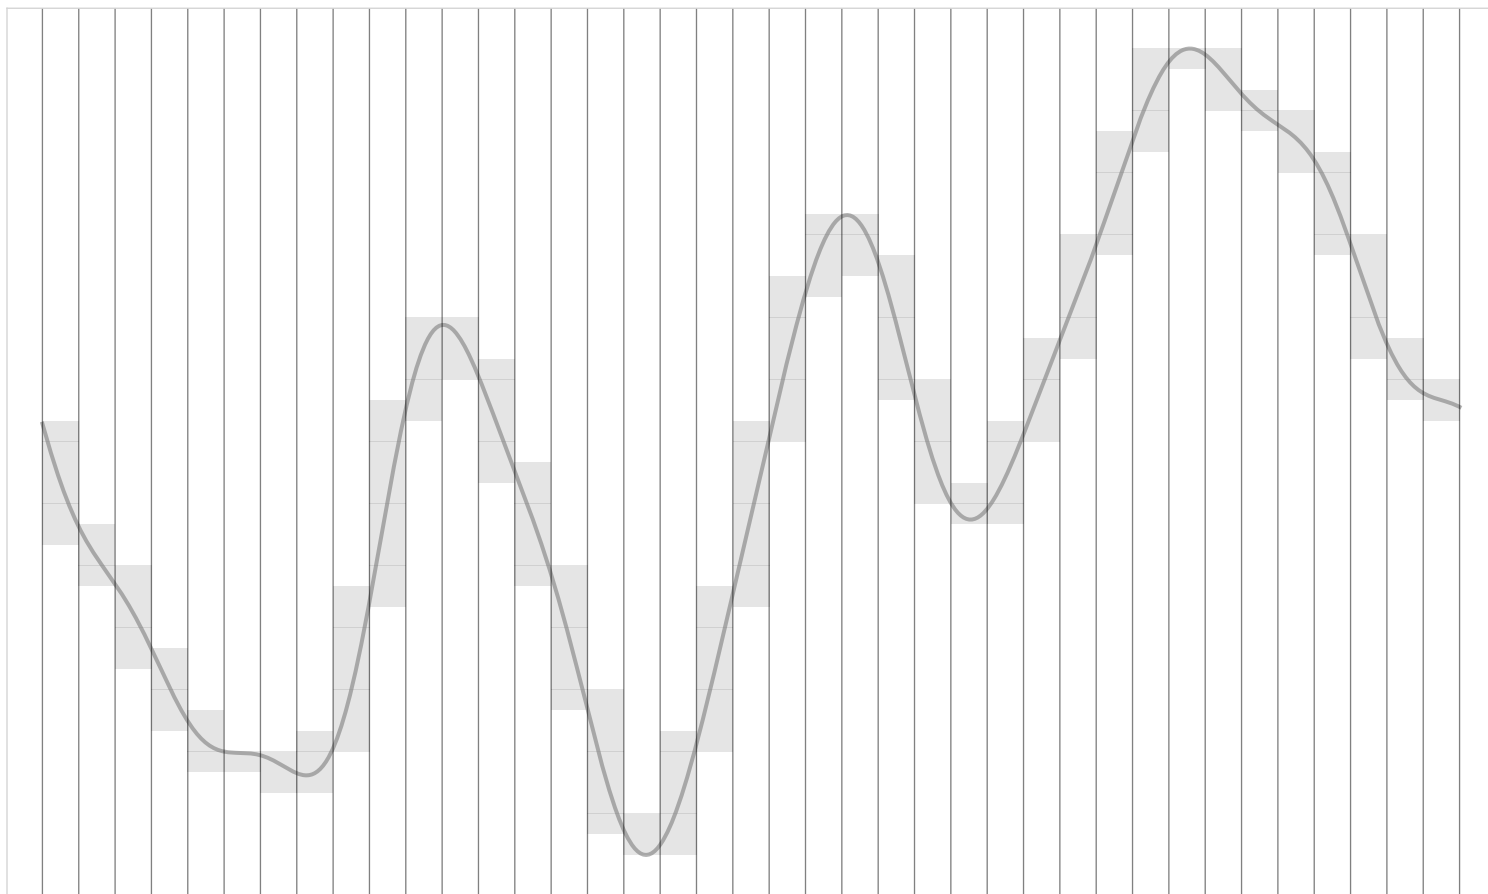

Supplement: supplementary_material [file attachment]

$d = 4$ 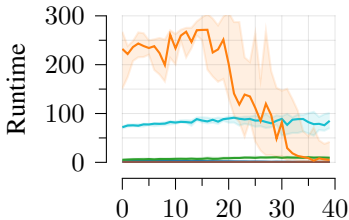 $d = 8$ 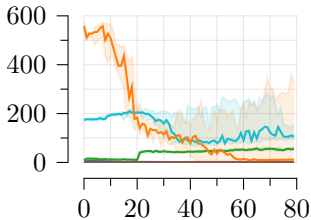 $d = 16$ 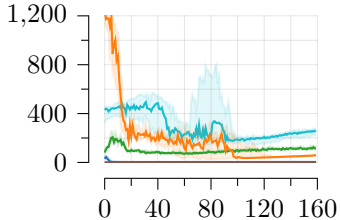

— EI    — MSEI    — PBGI    — TS    — KG

Supplement: supplementary_material [file attachment]

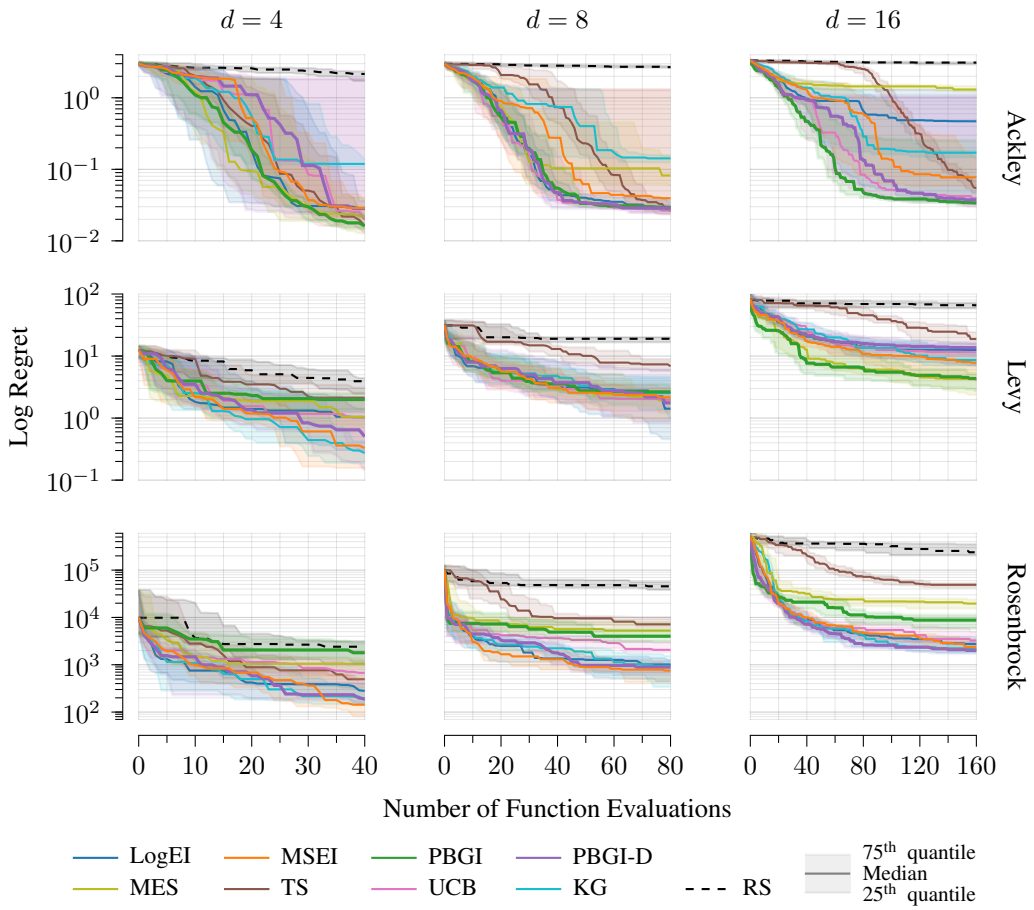

Supplement: supplementary_material [file attachment]

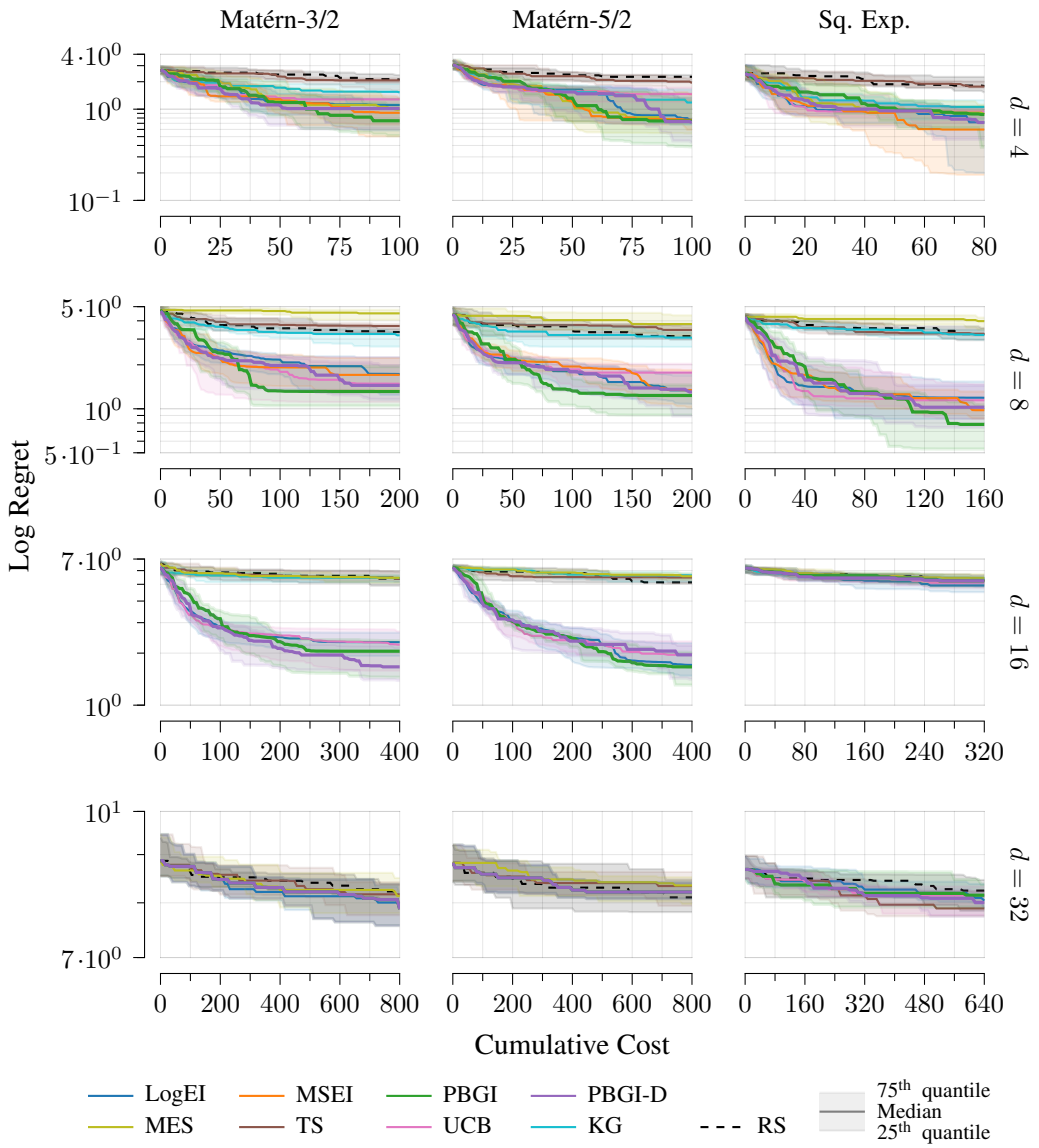

Supplement: supplementary_material [file attachment]

Best Observed Value

Known Costs

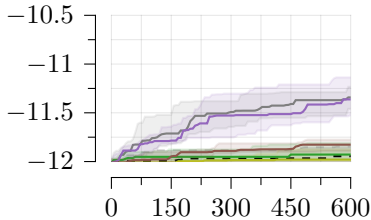

Unknown Costs

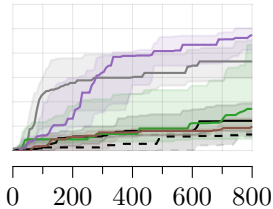

Cumulative Cost

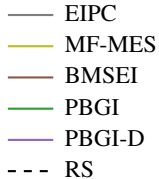

Supplement: supplementary_material [file attachment]

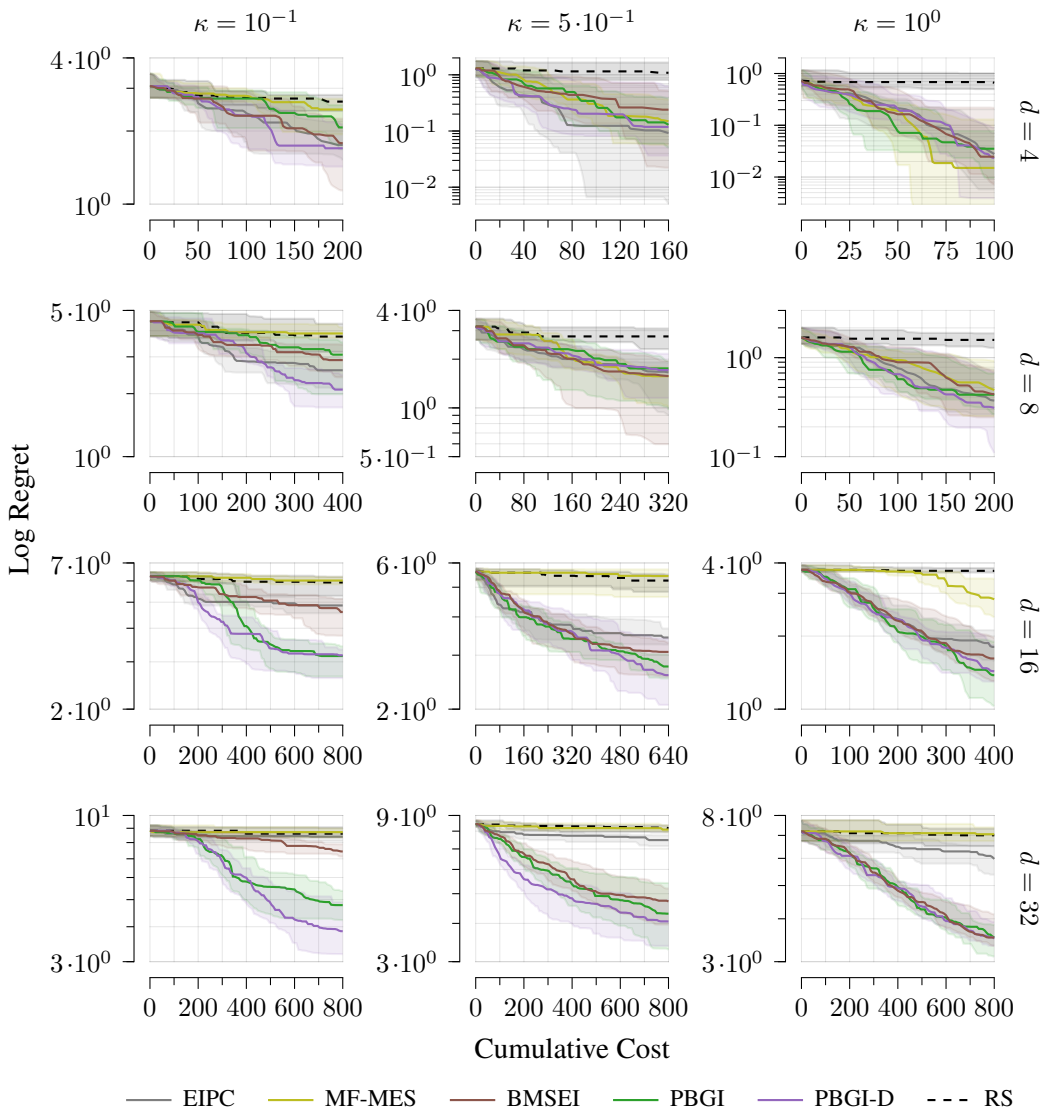

Supplement: supplementary_material [file attachment]

Log Regret

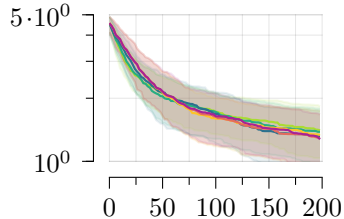Log  $\lambda_0$ 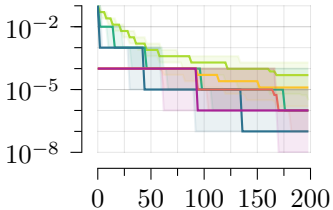

Cumulative Cost

|                                                                                     | $\lambda_0$ | $\beta$ |
|-------------------------------------------------------------------------------------|-------------|---------|
|  | $10^{-1}$   | 2       |
|  | $10^{-1}$   | 10      |
|  | $10^{-1}$   | 100     |
|  | $10^{-4}$   | 2       |
|  | $10^{-4}$   | 10      |
|  | $10^{-4}$   | 100     |

Supplement: supplementary_material [file attachment]

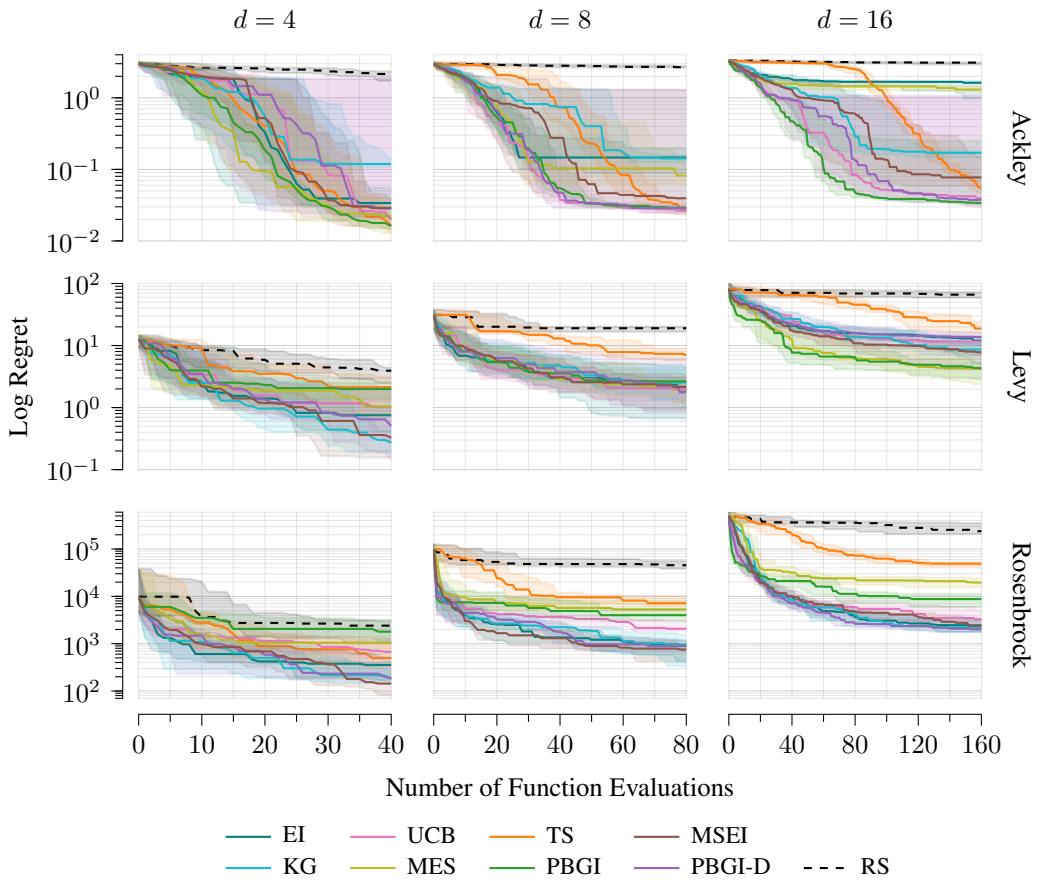

Supplement: supplementary_material [file attachment]

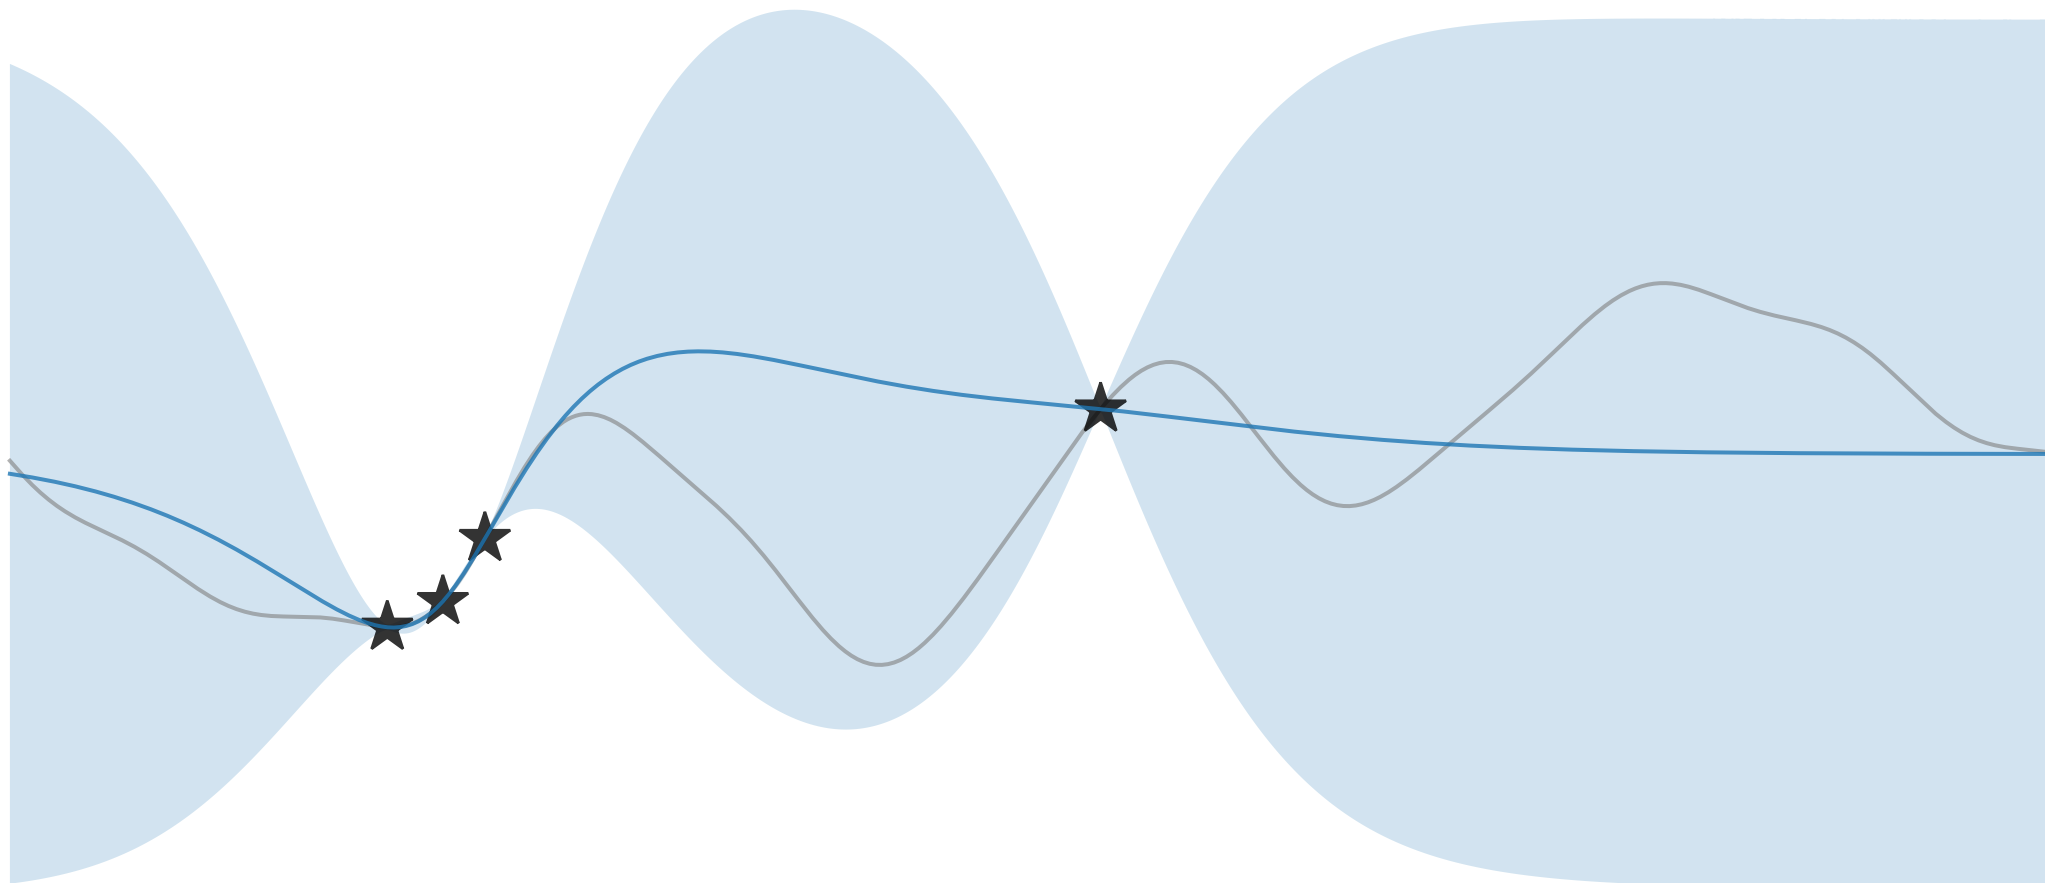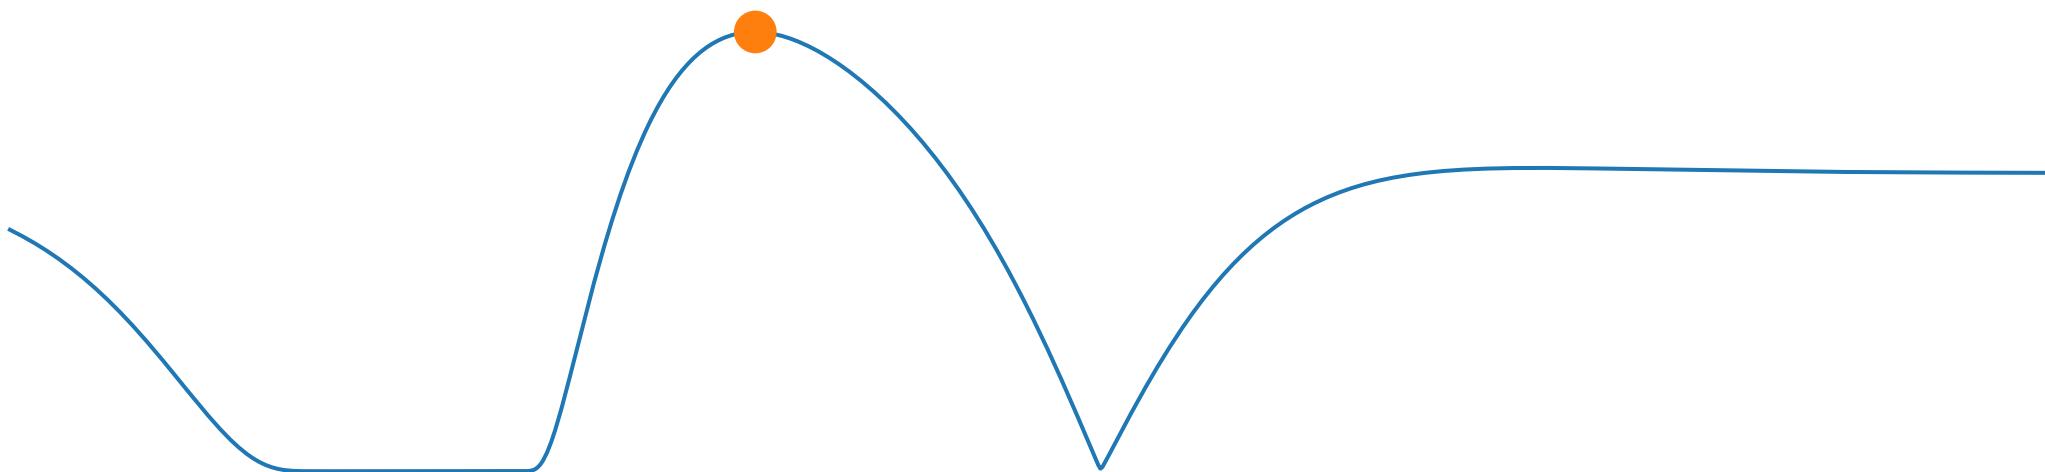

Supplement: supplementary_material [file attachment]

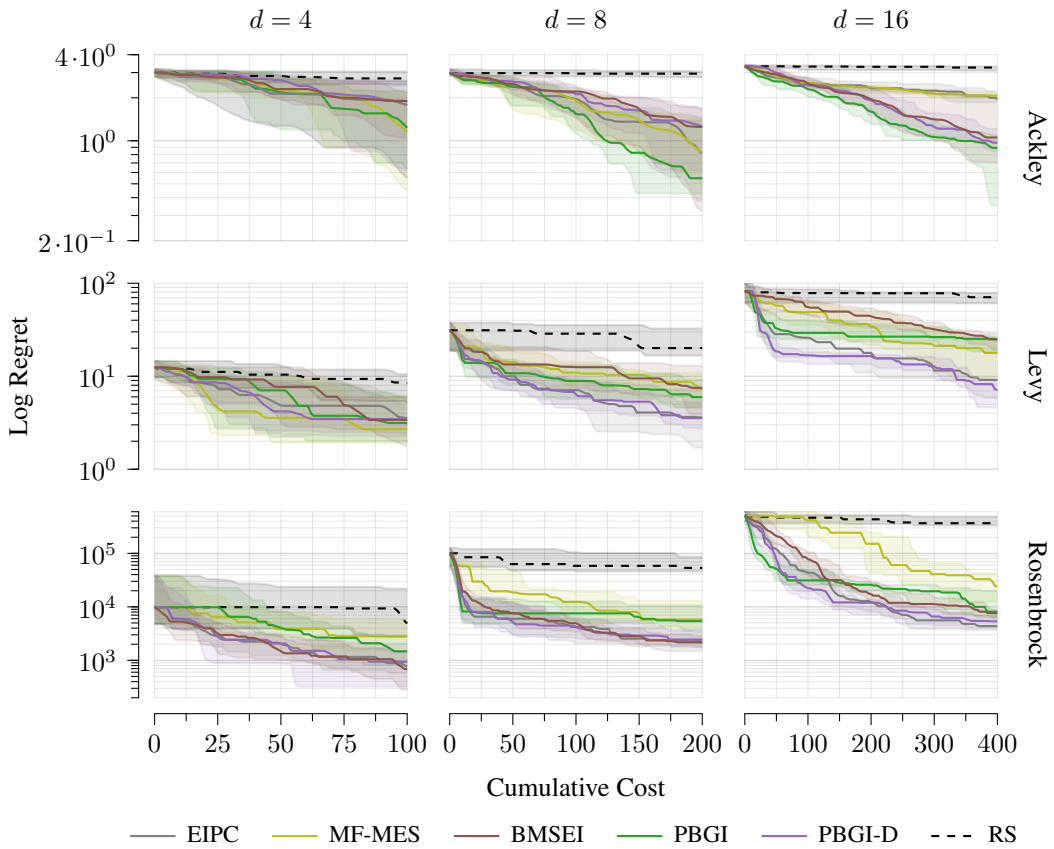

Supplement: supplementary_material [file attachment]

Expected Improvement

Large- $\lambda$  PBGISmall- $\lambda$  PBGI

Posterior

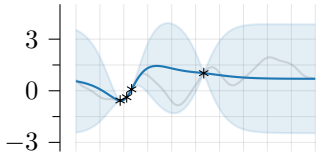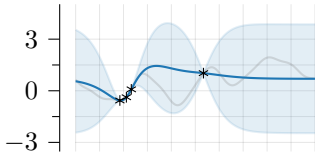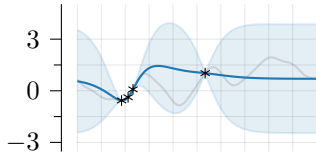

Acq

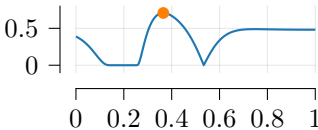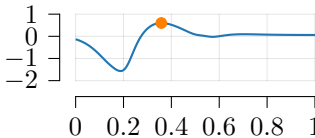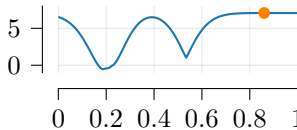

Supplement: supplementary_material [file attachment]

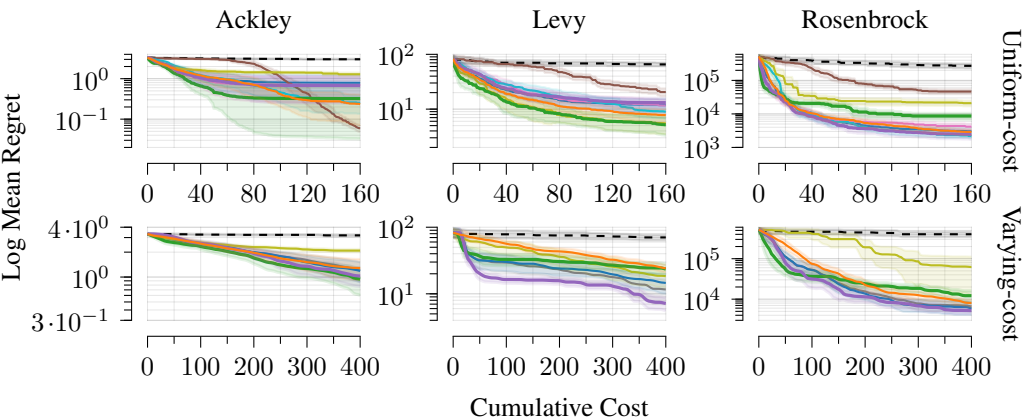

Supplement: supplementary_material [file attachment]

# Rosenbrock

Log Regret

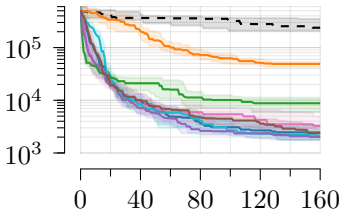

Uniform-cost

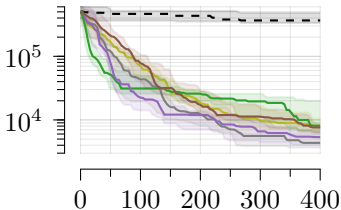

Cost-aware

Cumulative Cost

Supplement: supplementary_material [file attachment]
